# Supplementary material
Source: PubMed Central journal article supplement (PMC2707206)

A

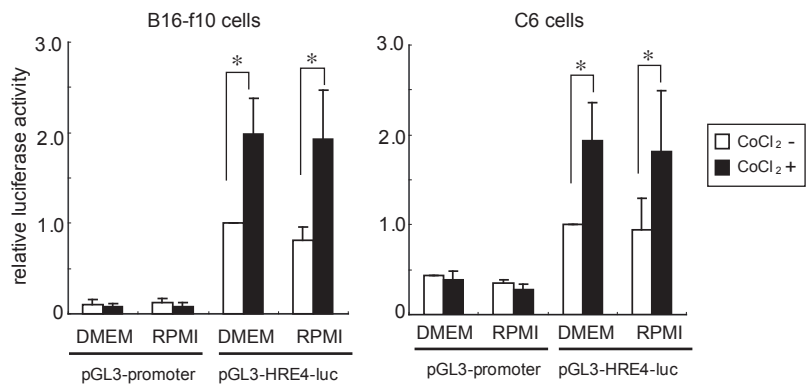

B

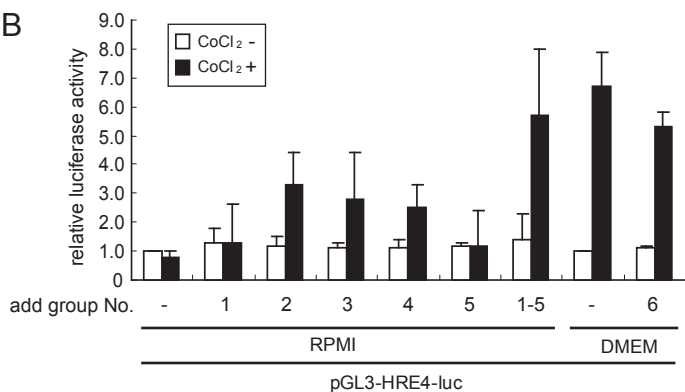

C

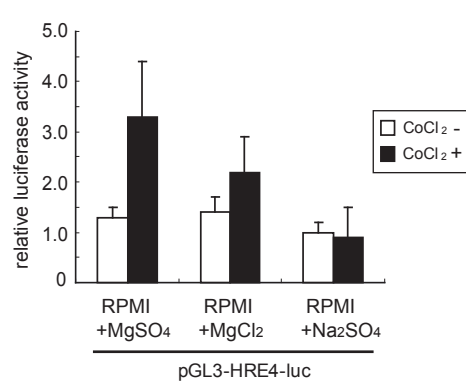

D

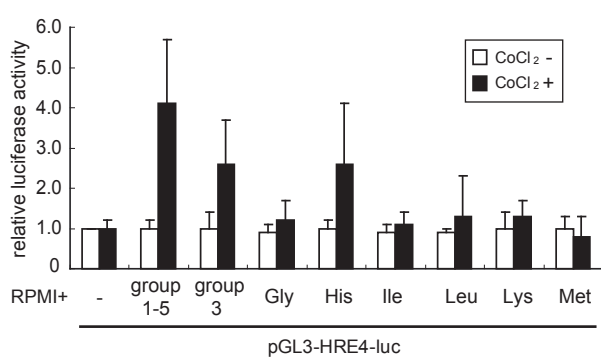

E

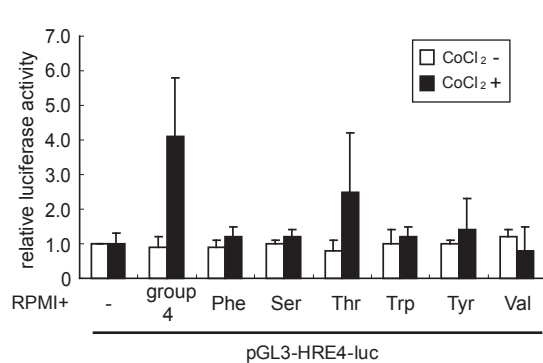

Figure S1

Supplement: supp_M109.004424_jbc.M109.004424-1.pdf [file supp_M109.004424_jbc.M109.004424-1.pdf]

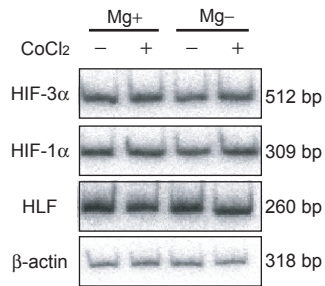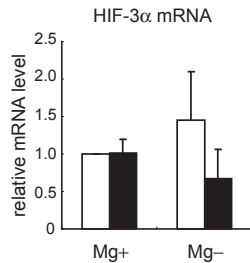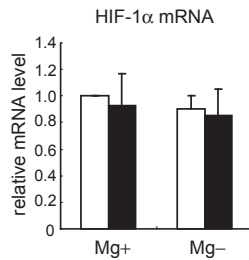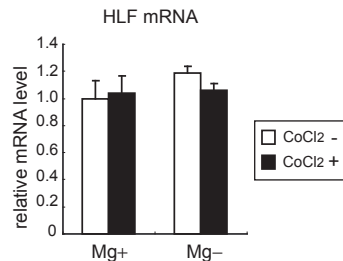

Figure S4

Supplement: supp_M109.004424_jbc.M109.004424-4.pdf [file supp_M109.004424_jbc.M109.004424-4.pdf]
